# Supplementary material
Source: publisher figshare collection journal article supplement (https://gsajournals.figshare.com/articles/dataset/_/12816482)
Supplement: Supplementary file 1 [file 1]

TABLE S3. TRAIT DATA SUMMARY STATISTICS

| Trait                                            | Female (mean(sd)) | Male (mean(sd)) | T-Test   | Wilcoxon Test |
|--------------------------------------------------|-------------------|-----------------|----------|---------------|
| Fasted Weight (g)                                | 14.09 (0.99)      | 16.94 (1.73)    | <2.2E-16 | <2.2E-16      |
| Fasting Glucose (mg/dL)                          | 83.58 (20.39)     | 98.79 (24.30)   | 6.26E-05 | 6.19E-06      |
| Length (cm)                                      | 88.80 (1.95)      | 92.28 (2.73)    | 1.28E-15 | 2.04E-14      |
| Fat Pad Weight (g)                               | 0.043 (0.02)      | 0.078 (0.04)    | 1.54E-11 | 1.88E-10      |
| White Blood Count (K/uL)                         | 6.31 (2.20)       | 5.95 (2.33)     | 3.60E-01 | 3.03E-01      |
| Lymphocytes (K/uL)                               | 5.15 (1.62)       | 4.90 (1.93)     | 4.14E-01 | 2.30E-01      |
| Monocytes (K/uL)                                 | 0.31 (0.14)       | 0.29 (0.14)     | 4.86E-01 | 4.89E-01      |
| Lymphocytes (%)                                  | 83.03 (4.47)      | 82.28 (4.14)    | 3.20E-01 | 3.36E-01      |
| Basophils (%)                                    | 0.12 (0.13)       | 0.17 (0.18)     | 5.42E-01 | 5.00E-01      |
| Red Blood Count (M/uL)                           | 9.32 (1.00)       | 9.28 (0.97)     | 7.88E-01 | 7.54E-01      |
| Hemoglobin (g/dL)                                | 14.79 (1.58)      | 14.56 (1.73)    | 4.30E-01 | 4.83E-01      |
| Hematocrit (%)                                   | 43.63 (4.08)      | 44.34 (4.29)    | 3.31E-01 | 9.99E-02      |
| Mean Corpus Volume (fL)                          | 46.88 (1.68)      | 47.84 (1.69)    | 1.28E-03 | 1.81E-04      |
| Mean Corpuscular Hemoglobin (pg)                 | 15.85 (0.36)      | 15.68 (0.88)    | 1.59E-01 | 8.23E-01      |
| Mean Corpuscular Hemoglobin Concentration (g/dL) | 33.87 (1.30)      | 32.86 (2.46)    | 3.44E-03 | 1.73E-05      |
| Red Cell Distribution Width (%)                  | 19.11 (1.00)      | 19.24 (1.09)    | 4.88E-01 | 3.14E-01      |
| Platelets (K/uL)                                 | 562.90 (125.60)   | 656.14 (152.13) | 1.73E-04 | 6.25E-06      |
| Mean Platelet Volume (fL)                        | 5.19 (0.39)       | 5.16 (0.44)     | 7.06E-01 | 5.19E-01      |

|                    |              |              |          |          |
|--------------------|--------------|--------------|----------|----------|
| Granulocyte (K/uL) | 0.75 (0.38)  | 0.75 (0.37)  | 9.95E-01 | 7.48E-01 |
| Granulocyte (%)    | 12.6 (4.06)  | 13.17 (3.88) | 4.11E-01 | 1.47E-01 |
| RDWa               | 33.62 (1.00) | 34.77 (1.41) | 2.26E-06 | 6.63E-06 |

---

TABLE S4. MAIN EFFECT LOD SCORES FOR THE INTERVALS CONTAINING EPISTATIC TRAIT QTLS

| Trait                       | Chromosome | SNP        | Position (Mb) | LOD      | p value |
|-----------------------------|------------|------------|---------------|----------|---------|
| Lymphocytes (%)             | 4          | rs13477644 | 35.28         | 0.393    | 0.182   |
|                             | 6          | rs13478739 | 47.03         | 9.535e-5 | 0.982   |
| Red Cell Distribution Width | 6          | rs13478633 | 12.25         | 0.316    | 0.966   |
|                             | 6          | rs13478641 | 16.06         | 0.345    | 0.926   |
